# Supplementary material
Source: PubMed Central journal article supplement (PMC4832007)
Supplement: npp2015283x2.pdf [file npp2015283x2.pdf]

Figure S1

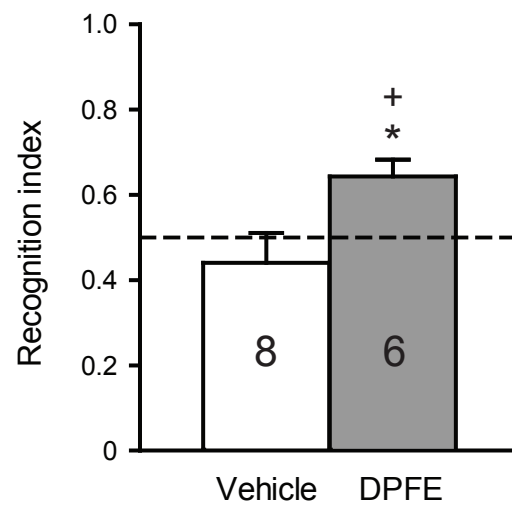

**Figure S1. Systemic DPFE restores novel object recognition in meth binge rats.** Novel object recognition testing from Experiment S1. \*  $p < 0.05$  compared to vehicle; +  $p < 0.05$  compared to a hypothetical mean of 0.50.

Figure S2

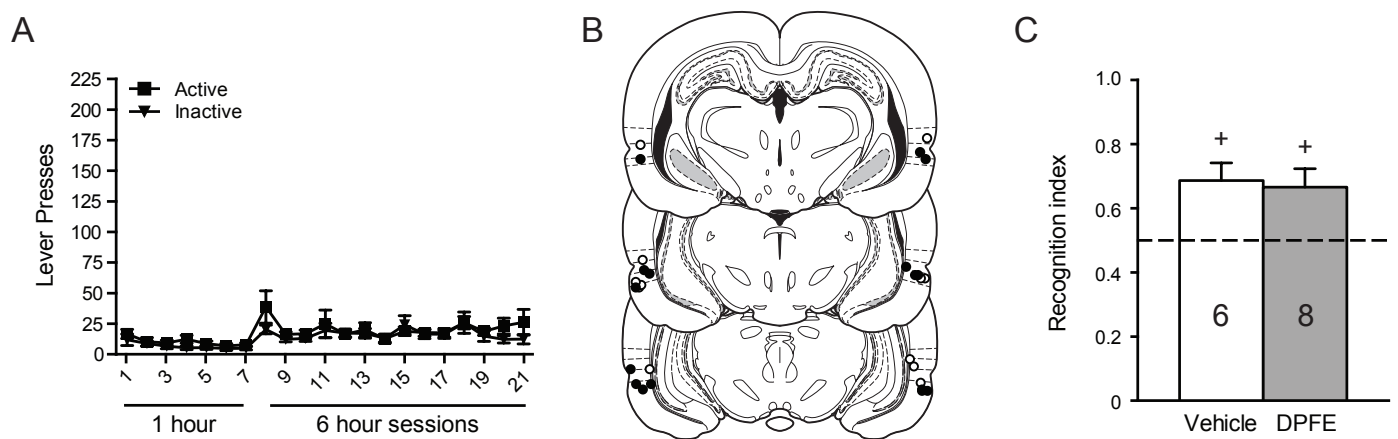

**Figure S2. Intra-perirhinal DPFE does not alter novel object recognition in saline controls.** (A) Lever-pressing behavior in saline controls. (B) Histological verification of microinjector needle placements within perirhinal cortex in saline controls. White dots reflect the needle tip location for vehicle infusions; black dots for DPFE infusions. Placements were located mainly in area 35, just below the rhinal fissure. (C) Novel object recognition testing from Experiment S2. +  $p < 0.05$  compared to a hypothetical mean of 0.50.

Figure S3

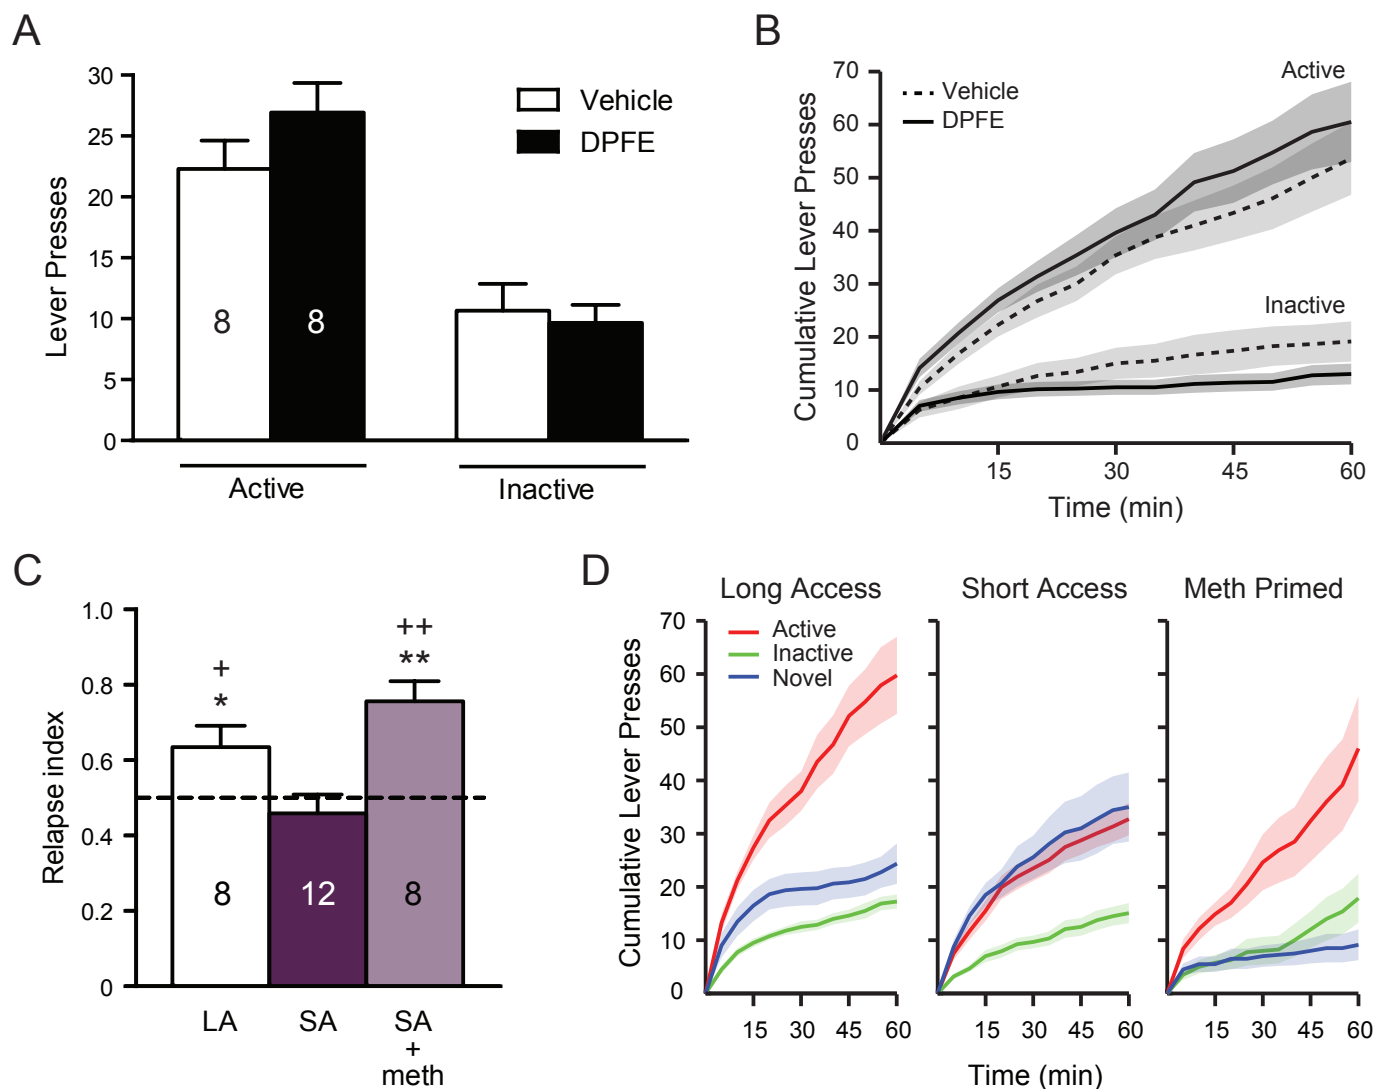

**Figure S3. Re-analysis of results from Experiments 1 and 2 after restricting analysis to the first 15-min of the test, as results from Experiment 3 indicated novelty effects were more pronounced early in the session.** (A) Re-analysis of the data shown in Figure 2A. Two-way ANOVA revealed a main effect of lever [ $F(1,28) = 44.89, p < 0.001$ ], but no other significant effects. (B) Time course analysis of behavioral data shown in Figure 2A. (C) Re-analysis of the data shown in Figure 3D. One-way ANOVA [ $F(2,25) = 8.44, p = 0.002$ ] \*  $p < 0.05$ , \*\*  $p < 0.001$  compared to SA group. +  $p < 0.05$ , ++  $p < 0.01$  compared to hypothetical mean of 0.50. (D) Time course analysis of behavioral data shown in Figure 3D.
